# Supplementary material
Source: PubMed Central journal article supplement (PMC7008365)
Supplement: supp_RA119.011547_156585_2_supp_451442_q38mp2.pdf [file supp_RA119.011547_156585_2_supp_451442_q38mp2.pdf]

## **Isolation and characterization of *O*-methyltransferases involved in benzyloquinoline alkaloids biosynthesis in sacred lotus (*Nelumbo nucifera*)**

Ivette M. Menéndez-Perdomo and Peter J. Facchini

### **SUPPORTING INFORMATION**

**Figure S1:** Visualization and detection of NnOMT1-NnOMT5 recombinant proteins.

**Figure S2:** *In vitro* 6OMT, 7OMT and 4'OMT activity screening of NnOMTs.

**Figure S3:** Identification of 7OMT activity of NnOMT5.

**Figure S4:** Effect of pH and temperature on the catalytic activity of NnOMT1 and NnOMT5.

**Figure S5:** Steady state enzyme kinetics for NnOMT1 and NnOMT5.

**Figure S6:** Chromatograms and mass spectra for authentic standards.

**Figure S7:** NnOMT5 homology model.

**Figure S8:** Amino acid sequence alignment of NnOMT5 and functionally characterized 7OMTs.

**Table S1:** Chromatographic and mass spectral data for sacred lotus BIAs detected in this study.

**Table S2:** NnOMT mRNA sequences used in this study.

**Table S3:** Amino acid percent-identity matrix among NnOMT candidates and functionally characterized OMTs from BIA-accumulating species.

**Table S4:** Substrate range for recombinant NnOMT candidates.

**Table S5:** Alkaloid content in different organs of two sacred lotus varieties.

**Table S6:** *O*-methyltransferase catalytic activity in different organs of two sacred lotus varieties.

**Table S7:** OMT transcript levels in different organs of two sacred lotus varieties.

**Table S8:** Primers used in this study.

**Table S9:** Amino acid sequence of functionally characterized OMTs involved in BIA biosynthesis in the Ranunculales.

### **References**

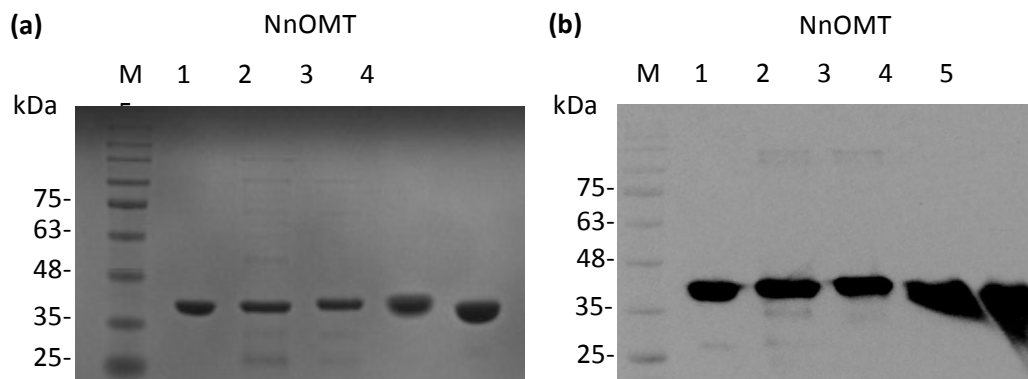

**Figure S1:** (a) Coomassie blue-stained SDS-PAGE and (b) Western blot detection of *Nelumbo nucifera* (sacred lotus) *O*-methyltransferase (NnOMT1-5) recombinant His<sub>6</sub>-tagged proteins expressed in *Escherichia coli* soluble fraction after cobalt-affinity purification. The molecular weights of marker (M) proteins are shown.

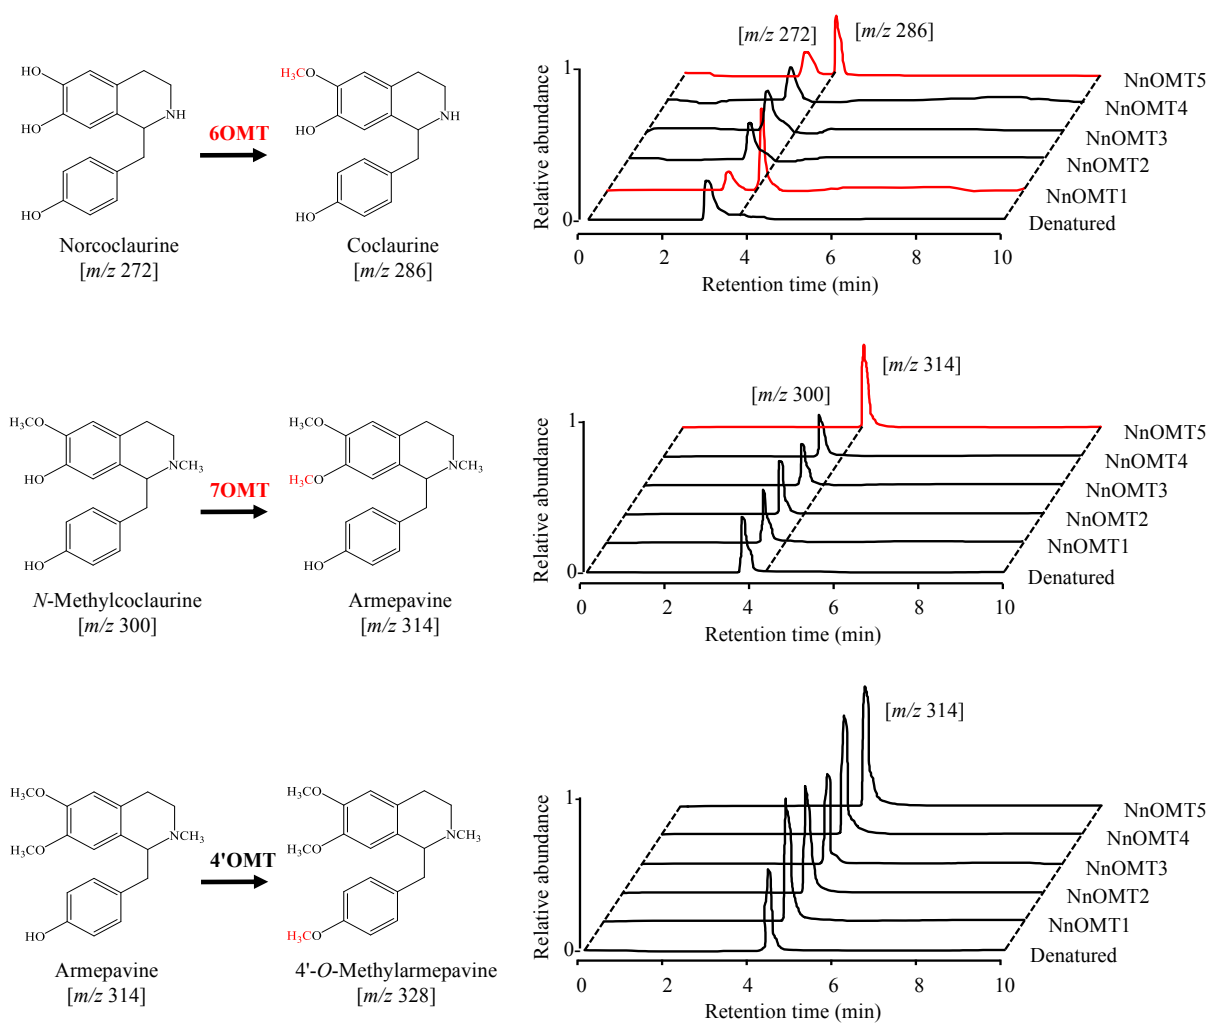

**Figure S2:** *In vitro* activity screening of recombinant NnOMTs. Expected reactions and chromatograms for selected substrates are shown. Extracted ions of potential reaction products were determined as the addition of 14 Da to the molecular ion of each possible substrate, and chromatographic and mass spectrometric data were compared with available authentic standards (i.e. coclaurine for 6OMT and armepravine for 7OMT reactions, respectively). Double methylations (mass increase in 28 Da) were not detected.

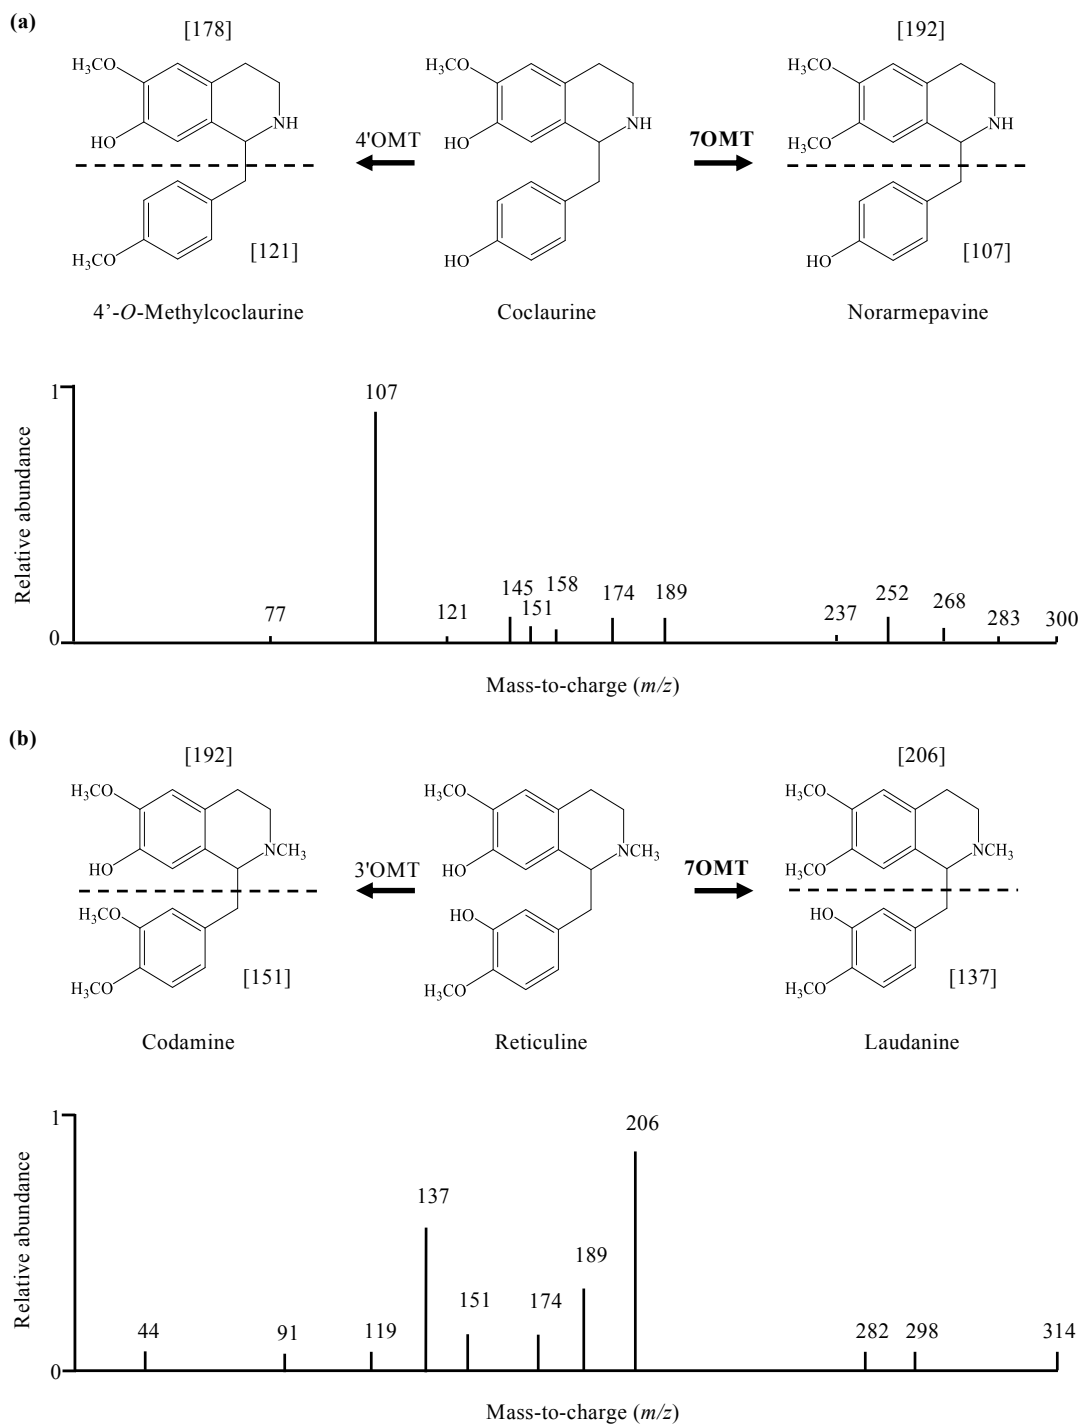

**Figure S3:** Identification of the *in vitro* reaction products of recombinant NnOMT5. Collision-induced dissociation (CID) analysis of peaks corresponding to the reaction product for **(a)** coclaurine and **(b)** reticuline are shown.

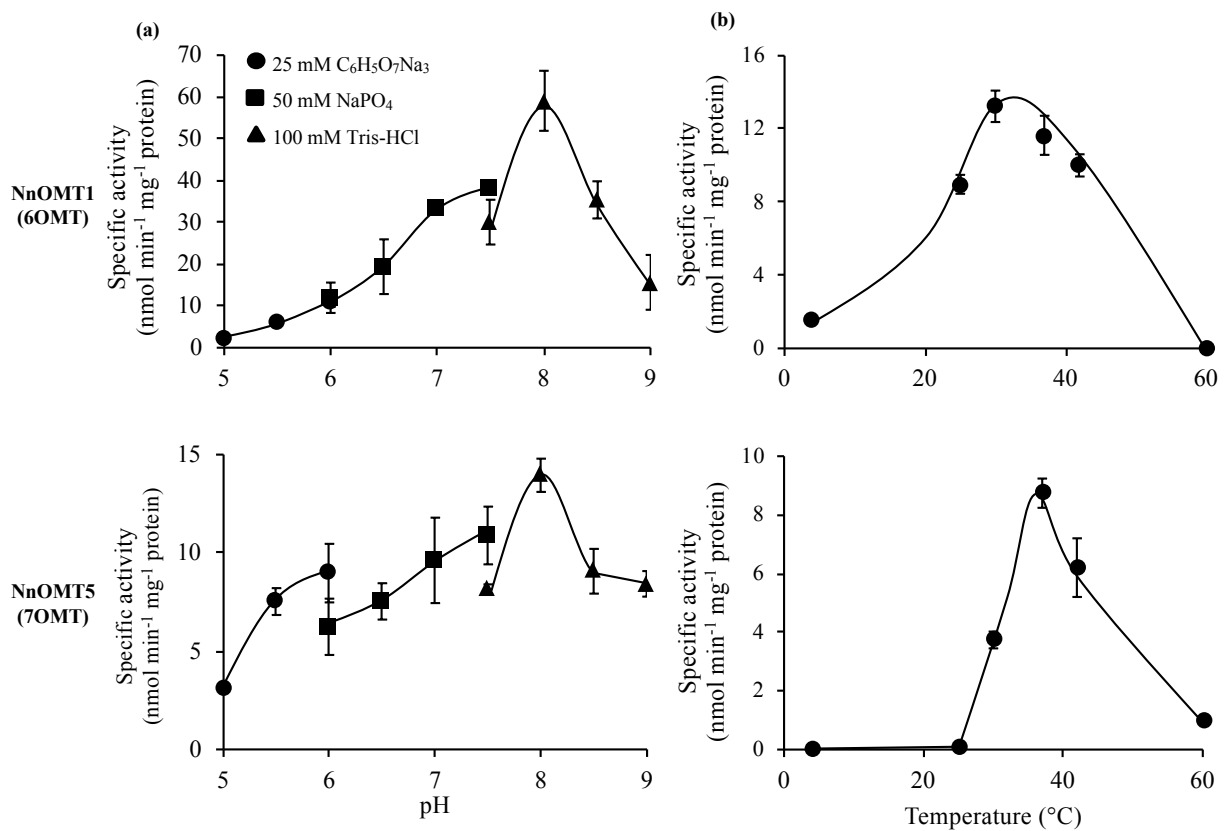

**Figure S4:** Effect of (a) pH and (b) temperature on the 6-*O*- or 7-*O*-methylation activity of recombinant NnOMT1 and NnOMT5 using (*R,S*)-norcoclaurine or (*S*)-*N*-methylcoclaurine as substrates, respectively. Values represent the mean  $\pm$  standard deviation of three independent measurements.

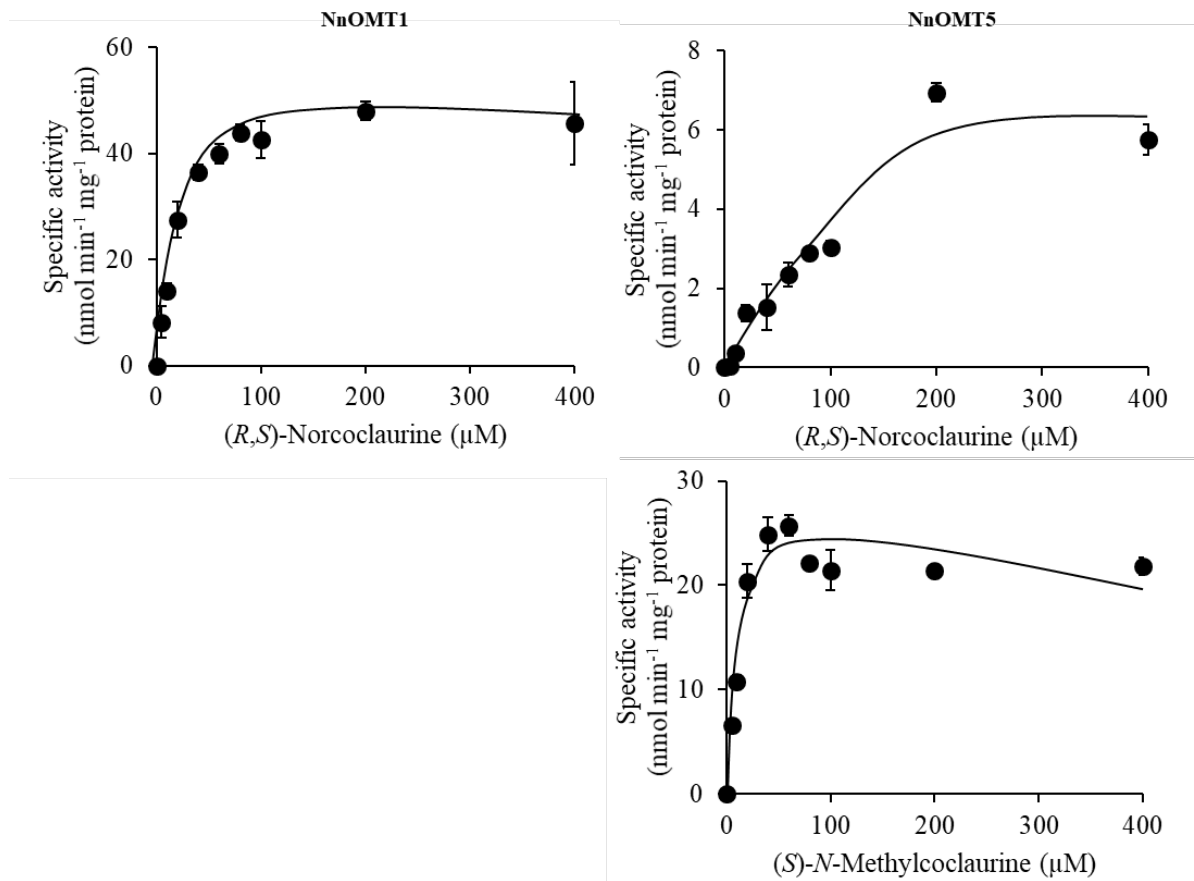

**Figure S5:** Steady state enzyme kinetics for recombinant NnOMT1 and NnOMT5 using (*R,S*)-norcoclaurine and (*S*)-*N*-methylcoclaurine with detection of their corresponding 6OMT and 7OMT activities. Values represent the mean  $\pm$  standard deviation of three independent measurements.

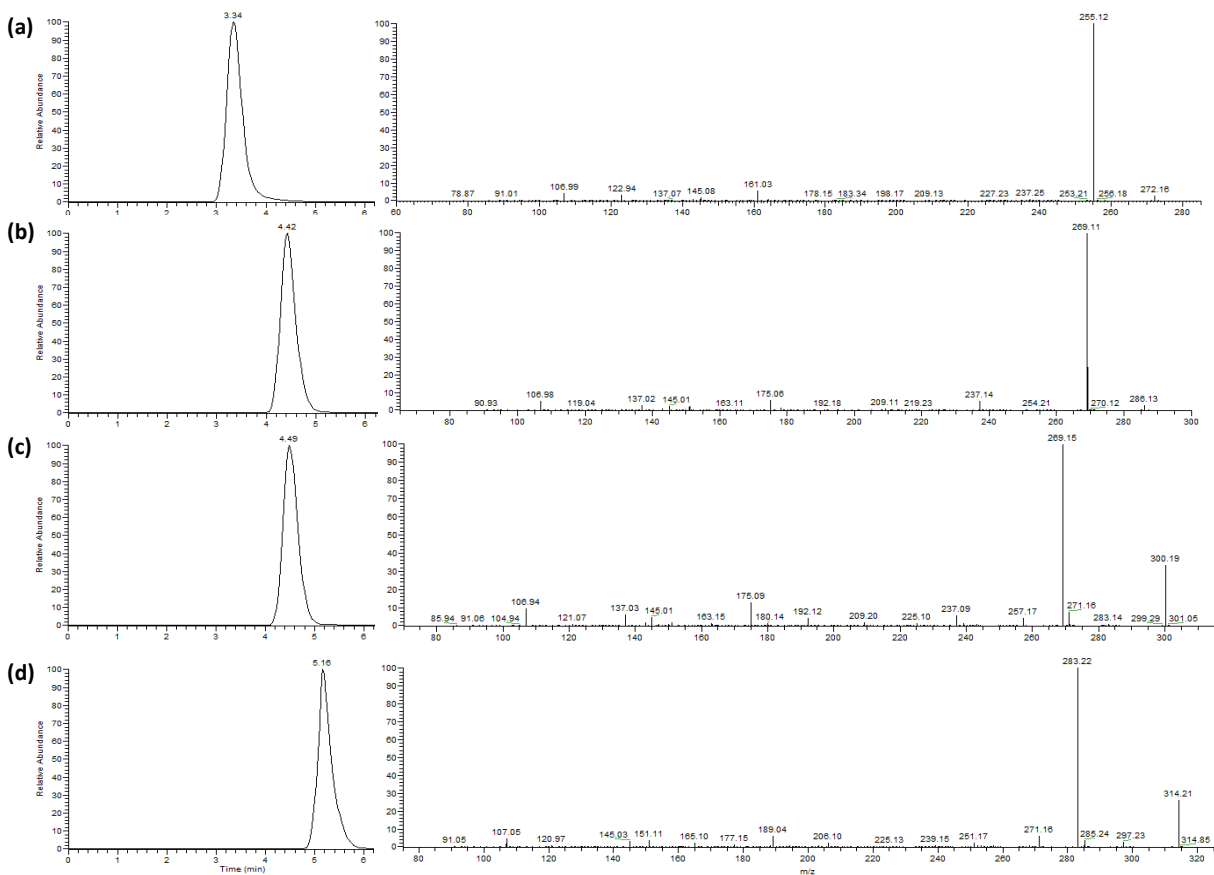

**Figure S6:** Chromatogram and mass spectrum for authentic standards: **(a)**  $(R,S)$ -norcoclaurine; **(b)**  $(S)$ -coclaurine; **(c)**  $(S)$ - $N$ -methylcoclaurine; and **(d)**  $(R)$ -armepavine. Retention times are shown in the chromatograms.

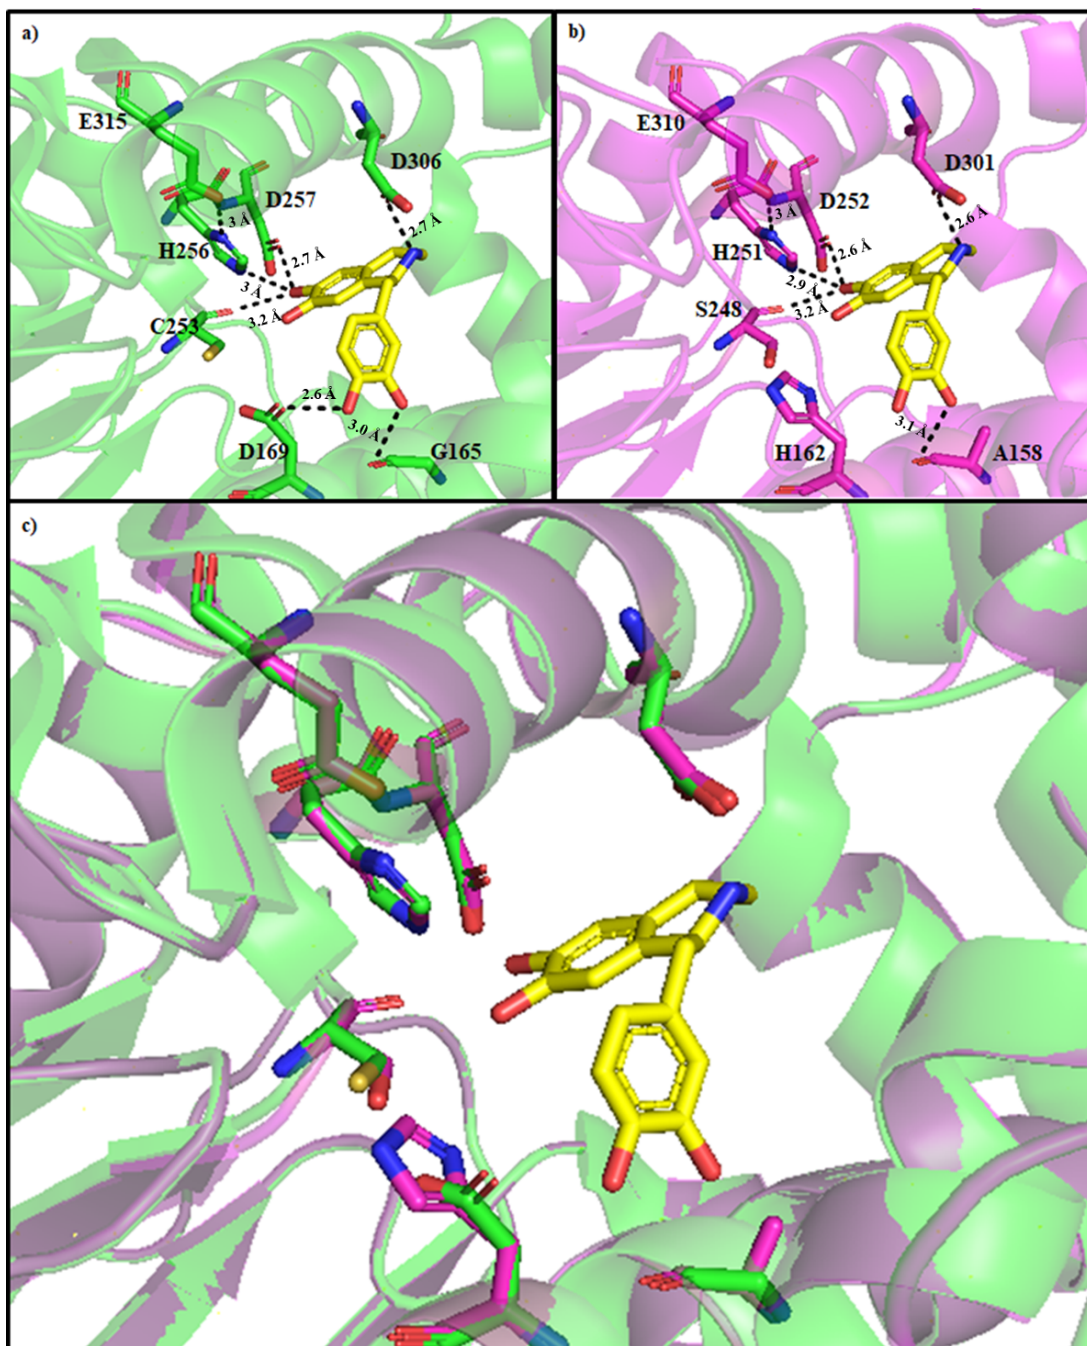

**Figure S7:** Cartoon representation of **a)** *Thalictum flavum* 6OMT (Tf6OMT, PDB 5ICE) in green, **b)** *Nelumbo nucifera* OMT5 (NnOMT5) homology model in magenta, and **c)** overlapping Tf6OMT and NnOMT5 structures. Key residues for BIA substrate binding and catalysis are drawn in stick and dot-surface representation to illustrate the shape of the active site around the substrate (*S*)-norlaudanosoline (in yellow). Previously reported interactions between residues in the active site and the substrate (1) are represented by dashed black lines, and distances between atoms are shown in angstroms (Å).



|         |                                                                  |     |
|---------|------------------------------------------------------------------|-----|
| NnOMT5  | ---MEEDMKAQAQVWKHIYGFVESFTLKCALIELGIADILYEHGQPMTSLSEASSIPLP-     | 55  |
| PsN7OMT | MEVVSQIDQENQAIWKQLYGFSESLLLKCAVQCEIAETIHNHGTPMSILELAAKLPID-      | 59  |
| Ps7OMT  | -MDTAEERLKGQAEIWEHMFAFVDSMALKCAVELGIPDIINSHGRPVITISEIVDSLKTN-    | 58  |
| Ct7OMT  | ---MTILQCCQNTKLLFAFADTMALKCVVELRIADIINSHGLPLISLSEIAAGIQSTS       | 56  |
| Ec7OMT  | ---MDEEIIILGQADICKYMYGFVDSMTLRCVVELGIPDIINSHGRPITLTELINGIPNL-    | 56  |
|         |                                                                  |     |
| NnOMT5  | ----SVSQDGLYRVLRYLVHMKLFDLQVDS-----GLKKYRLTPASKLLVKNQEKNL        | 104 |
| PsN7OMT | ---QPVNIDRLYRVMRYLVHQKLFNKEVISILNGGTVQVTEKYWLAPPAKYLRGSSQSM      | 116 |
| Ps7OMT  | TPSSSPNIDYLRTRMRLLVHKRLFTSELHQE-----SNQLLYNLTRSSKLLKDSKFNL       | 112 |
| Ct7OMT  | SSSSPPNINYLFRIMRLVVRKGVFSSHAPNQ-----NEETLYGLTNSSKALLRDANFSM      | 110 |
| Ec7OMT  | --SSSFDINYLQGITLIVRRRVFAVHKFDPKDG-TNLTEIRYGLTSSKCLLKDSKFNL       | 113 |
|         |                                                                  |     |
| NnOMT5  | ASEVFL--LQLYEIDTWNHLSAAVEGTVTPWEKCHGGVDYIEYFKKDSVANQLLSDAMTSH    | 162 |
| PsN7OMT | VPSVLGIIDEDMFAPWHILKDSLTCENIFETALCK-SISVYMSNPENMQISNGAMAFD       | 175 |
| Ps7OMT  | SPLVLWETNPILLKFWQYLGKCAQEKSSFFERAGCC-EIWDLALADPKFNNFLNGAMQCS     | 171 |
| Ct7OMT  | TPIIQALTHHCMSDSFHKLNKCVVEGGYAFKANGCC-EIWEFASMNPEFNRLFNSAMAST     | 169 |
| Ec7OMT  | APFVLLLETHPWITDPFNWYLGKCVQEGGSGFVKAHGS-DVFKFGSDHPFFKLFYDGMES     | 172 |
|         |                                                                  |     |
| NnOMT5  | TSMVTDALVKCKKAHILDVGSLIDVGGSTGVAAARATAKWFPSSIKCAVFDLPHVVAANAF    | 222 |
| PsN7OMT | SGLVTSHLVNECKSV-FGDEIKTLVDVGGSTGTALRAISKAFPNIKQTLFDLPHVVAADSF    | 234 |
| Ps7OMT  | TTTIIINEMLLEYKDG-FSGIAGSLVDVGGSTGSIIAETVKAHPHIQGINFDLPHVVAATAA   | 230 |
| Ct7OMT  | SKIAVDAILSGYKNG-FDGLR-SLVDVGGSTGTLIGEIVKAYPHLTGTNFDLPHVVAATAF    | 227 |
| Ec7OMT  | TKVLVQVVLDKYQQV-FKLVK-SIVDVGGSTGMMISEIVKNEPPIKGINFDLPHVVAEAP     | 230 |
|         |                                                                  |     |
| NnOMT5  | ECEFEVTRIGGDMFVSIPTKIDVVFMKSVLHDWQDEDCVKILKKCKEAISEK-GGKAVIVDI   | 281 |
| PsN7OMT | EIPTIITKVS GDMFKSIPSADAI FMKNILHDWNDDECIQILKRCQDVVSA--GGK LIMVEM | 292 |
| Ps7OMT  | EFPGVKHVGGDMFVDIPEADAVIMKWLHDWSDDECTIILKNQYRAIRKKNKGVIIIVDC      | 290 |
| Ct7OMT  | EHTGVVHVGGDMFVEIPHADAIILKWLHDWNDDECVKILKNCHKALANR-GVKVIVVEI      | 286 |
| Ec7OMT  | DYFGVEHVGGDMFVEIPQADAITMKGILHDWNDACVKILENCKKAIIPK--NGKVIIIDC     | 288 |
|         |                                                                  |     |
| NnOMT5  | VMDVESPNEETGARLGMEMDMLVA-VGGKERSERKEWHKLFKEAGYSGYKITPIV---AI     | 337 |
| PsN7OMT | VLDED-SFHPYSKLRILTSIDIMMVN-NGGKERTERKEWEKLEDAAGFASCKFTQMSVGFAA   | 350 |
| Ps7OMT  | VLRPD-GNDLFDKMGILFDVLMMAHTTAGKERTEAWEKILLNNAAGFPRYNVIRTP---AF    | 346 |
| Ct7OMT  | VLQPD-GVAPLDETRLI FDL SMLAHSSGGKERTERKEWEKLLRDGGFSRHRRIQIP---DV  | 342 |
| Ec7OMT  | VLNPD-GDDLFDIKVSDLGMRVHCSDGKERTERKEWEKLLKKGFPYKITHV---TV         | 344 |
|         |                                                                  |     |
| NnOMT5  | ESIIEVFP-                                                        | 345 |
| PsN7OMT | QSIIEVY--                                                        | 357 |
| Ps7OMT  | PCIIEAFPE                                                        | 355 |
| Ct7OMT  | TSIIEAYP-                                                        | 350 |
| Ec7OMT  | QSMIEAYPE                                                        | 353 |

**Figure S8:** Amino acid sequence alignment of NnOMT5 and functionally characterized 7-O-methyltransferases (7OMTs) from BIA-accumulating species. Fully conserved residues are shaded in black, whereas those shared by NnOMT5 and 7OMTs are shaded in grey. Ct, *Coptis teeta*; Ec, *Eschscholzia californica*; Nn, *Nelumbo nucifera*; Ps, *Papaver somniferum*.

**Table S1:** Chromatographic and mass spectral data for sacred lotus BIAs detected in this study. AS, authentic standard.

| Class                 | Alkaloid                       | Formula (+ H)                                                 | $m/z$ [M + H] <sup>+</sup> | Rt (min) | Product ions $m/z$ (relative abundance, %)                          | Reference CID |
|-----------------------|--------------------------------|---------------------------------------------------------------|----------------------------|----------|---------------------------------------------------------------------|---------------|
| 1-Benzylisoquinoline  | Norcoclaurine                  | C <sub>16</sub> H <sub>18</sub> NO <sub>3</sub>               | 272.12812                  | 3.3      | 272(4); 255(100); 161(6); 123(4); 107(4)                            | AS            |
|                       | Cocclaurine                    | C <sub>17</sub> H <sub>20</sub> NO <sub>3</sub>               | 286.14377                  | 4.4      | 286(3); 269(100); 237(6); 209(2); 175(6); 145(3); 137(3); 107(6)    | AS            |
|                       | <i>N</i> -Methylcocclaurine    | C <sub>18</sub> H <sub>22</sub> NO <sub>3</sub>               | 300.15942                  | 4.4      | 300(34); 269(100); 237(6); 209(2); 175(13); 145(5); 137(2); 107(10) | AS            |
|                       | Norarmepavine                  | C <sub>18</sub> H <sub>22</sub> NO <sub>3</sub>               | 300.15942                  | 5.3      | 300(8); 283(100); 268(7); 189(4); 107(4)                            | (2)           |
|                       | <i>N</i> -Methylisococclaurine | C <sub>18</sub> H <sub>22</sub> NO <sub>3</sub>               | 300.15942                  | 5.5      | 300(100); 269(24); 237(4); 192(12); 175(4); 145(6); 107(8)          | (3)           |
|                       | Armepavine                     | C <sub>19</sub> H <sub>24</sub> NO <sub>3</sub>               | 314.17507                  | 5.2      | 314(26); 283(100); 252(2); 206(2); 190(7); 151(4); 145(4); 107(5)   | AS            |
| Aporphine             | Anonaine                       | C <sub>17</sub> H <sub>16</sub> NO <sub>2</sub>               | 266.11756                  | 8.2      | 266(1); 249(100)                                                    | (4)           |
|                       | Roemerine                      | C <sub>18</sub> H <sub>18</sub> NO <sub>2</sub>               | 280.13321                  | 8.6      | 280(1); 249(100)                                                    | (5)           |
|                       | <i>N</i> -Normuciferine        | C <sub>18</sub> H <sub>20</sub> NO <sub>2</sub>               | 282.14886                  | 6.2      | 282(2); 251(100); 219(54)                                           | (5)           |
| Pro-aporphine         | <i>O</i> -Normuciferine        | C <sub>18</sub> H <sub>20</sub> NO <sub>2</sub>               | 282.14886                  | 8.0      | 282(1); 265(100)                                                    | (5)           |
|                       | Nuciferine                     | C <sub>19</sub> H <sub>22</sub> NO <sub>2</sub>               | 296.16451                  | 8.4      | 296(1); 265(100); 250(4)                                            | (3)           |
|                       | Pronuciferine                  | C <sub>19</sub> H <sub>22</sub> NO <sub>3</sub>               | 312.15942                  | 4.8      | 312(62); 283(24); 269(100); 254(4); 238(2); 206 (62); 177(4)        | (3)           |
| Bisbenzylisoquinoline | Nelumboferine                  | C <sub>36</sub> H <sub>41</sub> N <sub>2</sub> O <sub>6</sub> | 597.29591                  | 5.3      | 597(100); 566(3); 475(5); 192(12)                                   | (3)           |
|                       | Liensinine                     | C <sub>37</sub> H <sub>43</sub> N <sub>2</sub> O <sub>6</sub> | 611.31156                  | 6.0      | 611(100); 580(6); 568(6); 489(8); 206(20)                           | (3)           |
|                       | Isoliensinine                  | C <sub>37</sub> H <sub>43</sub> N <sub>2</sub> O <sub>6</sub> | 611.31156                  | 6.4      | 611(100); 580(6); 568(4); 475(12) 192(20)                           | (3)           |
|                       | Neferine                       | C <sub>38</sub> H <sub>45</sub> N <sub>2</sub> O <sub>6</sub> | 625.32721                  | 7.4      | 625(100); 594(8); 582(4); 503(6); 489(7); 206(8)                    | (3)           |

**Table S2:** *Nelumbo nucifera* OMT mRNA sequences used in this study. The start and stop codons are highlighted in green and red, respectively. GenBank accession numbers are indicated in parentheses.

| Gene<br>(Accession)      | mRNA sequence (5'-3')                                                                                                                                                                                                                                                                                                                                                                                                                                                                                                                                                                                                                                                                                                                                                                                                                                                                                                                                                                                                                                                                                                                                                                                                                                                                                                                                                                                                                                                                                                                                                                                                                                                                                                                                                                                                                                                                                                                                                                                                                                                                                |
|--------------------------|------------------------------------------------------------------------------------------------------------------------------------------------------------------------------------------------------------------------------------------------------------------------------------------------------------------------------------------------------------------------------------------------------------------------------------------------------------------------------------------------------------------------------------------------------------------------------------------------------------------------------------------------------------------------------------------------------------------------------------------------------------------------------------------------------------------------------------------------------------------------------------------------------------------------------------------------------------------------------------------------------------------------------------------------------------------------------------------------------------------------------------------------------------------------------------------------------------------------------------------------------------------------------------------------------------------------------------------------------------------------------------------------------------------------------------------------------------------------------------------------------------------------------------------------------------------------------------------------------------------------------------------------------------------------------------------------------------------------------------------------------------------------------------------------------------------------------------------------------------------------------------------------------------------------------------------------------------------------------------------------------------------------------------------------------------------------------------------------------|
| NnOMT1<br>(XM_010245752) | <p>GCACCTTAGCACCTGAGTGACAGAAAGAGCTCTAATTAAGTTTAGTAATTTATCTCACTCAGGGCACCGGCT<br/>           TTTGAGTTTACGAGGGGCATAGAATAGAGAGGAGA <b>ATG</b> GAAATTCAGAAGGAAGGTCAAGCAGCGGCGG<br/>           TAAAACTGGAAATTCGTTTATGGCTTTGCCGACTGTTTAGTCCTCCGATGTGCCATTGACCTCGGAATTGC<br/>           AGACATAATCCATAAGCAGGGAGAACCCTTGACGCTCTCTGAACTGGGGGCTCAAATTCCTGTGCAACCGG<br/>           TCAACACCGACTCACTGCACAGGTTAATGCGTTACTTGGTGCACATGAAGATCTTCACCAAGGAAACCCTA<br/>           GATGGCGAAGCAGCATATGGGCTGGCTCCACCGGTAAGTTTCATTGTAAGGTTGAAAGGTTGCAAGAGCATAG<br/>           TGTC AATCATATTAGTGGTCACCGACAAGGATTTTCATGGCACCCCTGGCACTGCCTCAAGGATAGCTTGTGC<br/>           GCGGAGGGGACAGCTTTTGAGAAGGCGTTAGGGAGGAGCATATGGACATACATGGCTGATCATCCGGAGA<br/>           AGAATAAGCTCTCAATGAAGGAATGGCTTGTGATACCAAACTCCTCATATCAGCCTTGGTTCAAGACTGC<br/>           AAGGATTATTCCAAGGAATAATGCTGGTGGTGGTGGTGGTGGTGGTGGTGGTGGTGGTGGTGGTGGTGGTGGT<br/>           TGCCAAGGCCTTTCCACCTAAAATGTACAATTTATGATCTACCTCATGTCATTGCCGACTCCCCTGATTA<br/>           CCCTGAGGTCGACCGATTGCAGGGCAGATGTTCAAACACATTCTAGTGCCGATGCCATCTTATTGAAGT<br/>           GCATCCTCCATGACTGGGATGATGGTGAATGCATTGAAATTTCAAAGCGATGCAAGGAATCAGTGCCTAGA<br/>           GAGGGTGGAAAAGTTATCATCGTCGACATAGTAGTAGATTGGAATCTAAGCATCCCTTAAACAAAGACTG<br/>           ACTAAGCTTGGATTGGACATGATGGTCCACTGGAGGAAAAGAGAGGACTGAGGCAGAAATGGAAGAAG<br/>           CTTTTGAATGCTGCAGGGTCCCTGTATTTAAGATTACACATATATCTGCCGTTCAATCTGTAATTTGGCCCT<br/>           ATCCTTAT <b>TAG</b> CTTTTCTCTCTCTCCCCAGGTCTAGCTACGTCTTCTTCTTCAATACTAATAATATTTTA<br/>           TTTTGGTTCGGTTATATATTAGTGTCAATAGGATGGGTTCAAGTCTAAGGGCCTGTTGTTGCTCTCAAGTC<br/>           ATCTGATGTGTAATAATTACATTAAGAGGATATTGGTATTGGTGAACC</p>                                                                                                                                                                                                                                                                                                                                                                                                 |
| NnOMT2<br>(XM_010249599) | <p>TGTAACAATTAAGATGGAAGGCTGTGTCTTGACTACTTGCATTGCACTTGTCCCTGAGTGAGAGAAAAGAG<br/>           AGAGAGAGCTCTAATTAAGTTCCGTAATTTATCTCGTTCAGGTTACCGGCTTCTGAGTTCAAGAGGGACCTA<br/>           GAGAGGAGA <b>ATG</b> GAAATTCGGAAGGAAGTTCAAGCTGACGAGGTTGAAATCTGGAAATTCGGATATGACT<br/>           TTGCCGACACTTTAGTCTCCGATGTGCCATTGAGTTCGGTATTGCAGACATAATCCATAAGCAGGGAGAA<br/>           CCCTTGACGCTCTTTGAACTGGGGGCTCAAATTCCTGTGCAACCAGTCAACACCGATCACTTGCACAGGTTA<br/>           ATGCGTTACATGGTGCACATGAAGATCTTCACCAAGGAAAACCTAGGTGGCGAAGAACRATATGGGCTATC<br/>           TCCACACGGTAAGTTCTTGTAAAAGGGTGGGACAAGAGCATGGCGTCAGCCATATTAGCGTCACTGACG<br/>           AGGATTTCTTTGACCCCTGGCACTGTCTCAAGGATGTCTTGGCCGGCGAGGGGACAGCTTTTGAAGAGGCG<br/>           TTAGGCAAGAGCATATGGGCATACGTGGCTGATCATCCGAGAGAAGAATAAACTTTCATTAAGTAATGGC<br/>           TTGTGATAACCAGTTTCATCAGTCTTGAATCAAGACTGTAAGGATGTATTCCAAGGAATAAAGTCCGGT<br/>           GGTGGATGTTGGTGGAGGCACTGGAACCTGATGAGAGACATTGCCAAGGCCTTTCCACCTAAAATGTA<br/>           CAATTTATGATCTACCTCATGTCATTGGCAGTCACTGATTACCTGAGGTCGACCGGATTGCAGGGCAGCA<br/>           CTTTGAACACATTCTAGTCCGATGCCACTTATTGAAAGTGGATCTCCATGATTGGGATGATGGTGAAT<br/>           GTATTGAAATTTAAAAGCGATGCAAGGAATCAGTGCCTAGAGAGGGTGGAAAAGTTATCATCGTCGACATA<br/>           GACTAGATCCGGAATCTAAGGATCCCTTAAACAAAGGCTAGATTAAGGTTGGATTTGGACATGATGGTCTA<br/>           CACTGGAGGAAAAGAGAGGAGTGAAGGCAGAATGGAAGAAGCTTTTGAATGCTGCAGGGTCCCTGGATAT<br/>           AAGATTTTACATGATGCTGCCGTTCAATCTGTAATTAAGGCTATCCTTAT <b>TAG</b> CTTCTCTCTCTCCCC<br/>           CCCCCGGTCCAGTACTTGTCTTCTTCTCAGTATTAATAATATTACTTTTGTAGTTGACATATATT<br/>           AGTGTCAATAGGATGGGTTCAAGTCTAAGAATGACAATTTTATTAAGAAAAAATACCATAGATAGGTTAG<br/>           GTCTGTATTACAGTTCCTTCTTCCACATAGCTGCGACTAACATTGGATAATGGCTTTCTTACTATCCATTATC<br/>           ATATCAATCCATAACAATCCACTACCTATTACCAACTCTACCCCTCATCATTCTGTGAGATTGACCATTTGT<br/>           GAGTTTGTATTACCAACGCTGAATGATTTTCTGAAAATTTTACTCAATAAAAAAATGGATCATATTAATT<br/>           ACTATATTTATTTTGGCATTTTGGTTAAGGTTGTCAAATGGGTCAGGCAGACCCTACAGACCCAAAATGAA<br/>           TCTACACAATTATAT</p> |
| NnOMT3<br>(XM_010249600) | <p>CGTGACTACTTGCCTAGCATTGTACCTGAGTGAGAGACAGAGAGAGATAGAGCTCTAATTAAGTTGAGT<br/>           AATTTATCTTATTCAGGGCACCGGCTTTGAGTTAAGGAGGGGCATAGAGAGGATA <b>ATG</b> GAAATTCAGAAG<br/>           GAAGTTCAAGCAGCCGACGTTGAAATCAGGAAATTCGGTTATGGCTTTGCCGACATTTTAGTCAATCCGATG<br/>           TGCCATTGAGCTCGGAATTGCAGACATAATCCATAAGCAGGGGAAACCCCTTGACGCTCTCTGAACTGGAGG<br/>           CTCAAATTCCTGTGAAACCGGTCACACCGATCACTTGCACAGGTTAATGCGTTACATGGTGCACATGAAG<br/>           ATCTTCAACCAAGGAAAACCCCTGATGGCGAAGAACGATATGGGCTGGCTCCACTGGGTAAGTTCCTTGTAAA<br/>           TGGTGGGACAGGAACATGGTGTGAGCCATATTAGCGGTCACTGACAAGGATTTATGGTACCCTGGTACC<br/>           GTCTCAAGGATAGCTTGGTGGCGAGGGGACAGCTTTTGAGAAGGCGTTAGGGAAGACCATATGCGAATG<br/>           CATGGCTGATCATCCGGAGAAGAAAAGCCCTTCAATGAAGCAATGGCTTGTGATACGACCAGGCTCCTCA<br/>           CATCAGCCTTGATTCAAGACTGCAAGGATTTATCCAAGGAATAATGTCGTTGGTGGATGTTGGTGGAGGC<br/>           ACTGGAAGTCCATGAGAGACATTGCCAAGACTTTCCCACTAAAATGTACAATTTATGATCATCTCCTCAT<br/>           GTCATTGCCGACTCCCCGGATTACCTGAGGTCGACCGGATGCAAGCAACATGTTCAAGCAACTCCCTAG<br/>           TGCCGATGGCATCTTGTGAAAGTGCATCTCCATGACTTGGGTGACCGTCAATGCATTGAAATTTACACGG<br/>           ATGCAAGAATCAGTGCTAGAGAGGGTGGAAAAGTTATCATCGTCGACATAGTACTAGATCCGGAATCTA<br/>           CGGATCCCTTAAACAAAGGCCAGATTAAGGTTGGATTTGGACATGATGGTCTACTGGAGGAAAAGAGAG<br/>           GAGTGGGACAGAATGGAAGAAGCTTTTGAATGCTGACGGGTTCCCTCGATAAAGATTTTACATATAGCTG<br/>           CCGTTCAATCTGTAATTGAGGCCTATCCTTAT <b>TAG</b></p>                                                                                                                                                                                                                                                                                                                                                                                                                                                                                                                                                                                                         |
| NnOMT4                   | <p>ATGTAGTCTACTACATTGGAGACCTCCTCCTATCAGACTGAACTGTAACATTCAAAGGGAACACCGTGAC<br/>           TACTTGCCTTGTACCTGAGAGAGAGAGAAAAAAGAAAGAGAGGCATGCAAGGCATAGAGTAGAGATAGG</p>                                                                                                                                                                                                                                                                                                                                                                                                                                                                                                                                                                                                                                                                                                                                                                                                                                                                                                                                                                                                                                                                                                                                                                                                                                                                                                                                                                                                                                                                                                                                                                                                                                                                                                                                                                                                                                                                                                                                   |

---

(XM\_010273389) AGA **ATG** GAAAAATCAGAAGGAAGTTCAAGCAGCCGAGGCTAAAATCTGGAATTTTCGTCTATGGCTTTGCCGA  
CACTTTAGTCCCTCCGATGTGCCATTGAGCTGGGTATTGCAGACATAATCCATAAGCAGGGGAGAACCCTTGA  
CGCTCTCTGAACTGGGGGCTCAAATTCCTCTGAAAGTCGGTCAACACCCGACCACTTGCACAGGTTAATGCGTT  
ACTTGGTGCACATGAAGCTCTTACCAAGGAAACCCTAGATGGCGAAGCTCGATATGGGCTGGCTCCACCG  
GCTAAGTTGCTTGTA AAAATGGTGGGAGGACAAGGGCTTGGCGTCAATCATAATTTGGGATCACTGACAAGGA  
TTTCATAGCACCTGGCACCATCTCAAGGATAGCTTGGCCGGCGATGGCGAGGAGACAACCTTTGAGAAGG  
TGTTAGGGAAGAGCATAATCGACATAATGGCTGATCATCTGGAGAAGAGTATGTTGTTCAATGAATCAATG  
GTTTCATGATACCAGGCTCTTACATCAGTCTTGATTCAAGACTTCAAGGATGATTCCAAGGAATTAAGTCG  
TTGGTGGATGTTGGTGGAGGCTCTGAACTGACATGGGAGCCATTGCCAAGGCCTTTCCACCTAAAAATG  
TACAAATTTATGGTCTACCTCATGTCATTGCCGACTCCCTGATTACCTGAGGTCGACCGGATTTCCAGGCGA  
CATGTTCAAACACATTTCCAGTGCCGATGCCATCTTATTGAAAGTGCATCCTCCATTACTGGGGTGATGGTCA  
ATGCATTGAAATTTAAAGAGATGCAAAGAATCAGTGCCTAGAGAGGGTGGAAATGTTATCATCGCCGAC  
GCAGTAGTAGATTTGGAATCTAAGCATCCCTACTTAACAAAAAATTTACTAAGCACGGATTTGGACATGAT  
GCTCAACACTGGAGGAAAAGAGAGGACTGAGGCAGAAATGGAAGAAGCTTTTTAATGCTGCAGGGTTCCCT  
GCATATAAGATTACACATGTAGCTGACGTTGAGTACTCTGTAATTGAGGCCTATCCTTAT **TAG** CCTCCCCC  
TCCCCCGTCCAGCAACTTGTCTTCTTCTTTCAGTACTAATAATATTTAGCTTTTGTGGTGGTGCATATAT  
ATTAGTGTATGGGATGGGTTCAAGGCTACAGTACGATGACCATTCTTTTCCACA

---

CTCCTGCTGGTCTTAGCGGAGCCACAAATCAGTGGTGCACCAGCTCTATAAAAAGAAATTCACTGCGTTTGC  
CAAGAGGCCAATTCGATCGATCACTAAGCTTTTGAGAGAAAAGAGAGAAAGATTGAGGCGGACGCC **ATG** GA  
GGAGGACATGAAAGCTCAAGCCCAAGTGTGAAACACATATACGGCTTCGTGCGAGTCATTCACTCTCAAAT  
GCGCGATCGAACTCGGGATCGCGGACATACTCTACGAACATGGTCAGCCCATGACTCTCTCCGAGTTAGCC  
TCTCCATCCCTCTTCCCTCTGTCAGCCAAGACGGATTGTACAGGGTGTGCGTTACCTCGTGCACATGAAA  
CTCTTCGACCTGCAGGTGATTCGACGGGTTAAAGAAGTACCGGCTCACTCCCGCGTCCAAGCTCTTGGTC  
AAAAACCAGGAGAAGAACCCTGGCATCCTTCGTTCTCCTGCAATTGTACGAGATAGACACTTGGAAACCACCT  
AAGTGCCGAGTGGAAAGGTACCGTGACACCCTGGGAGAAGTGTACGGCGGCGTGGACTACATAGAGTAC  
TTAAGAAGGACTCGGTGGCGAATCAGTTGTTGAGCGACGCGATGACGAGTACACGAGTATGGTGACGG  
ACGCGCTGGTGAAGGGCTGCAAGAAGGCGCACATCCTTGATGGAGTAGGGTCCCTAATTGACGTGGGCGG  
GTGTAAGTGGGTTGCTGCTAGAGCCATCGCTAAGTGGTTCCCCAGTATAAAATGTGCGGTGTTTGATCTGCC  
CCACGTAGTAGCCAACGCGCCCGAGTGCCCCGAGGTGACTCGGATCGGAGGCGATATGTTTCGTATCAATTC  
CGAAAACGGATGTGGTGTTCATGAAGTCGGTGTACACGACTGGGGAGACGAGGACTGCGTAAAGATTCT  
GAAGAAATGCAAGGAGGCGATATCGGAGAAAAGGAGGAAAAGCAGTGATCGTGGATATTGTAATGGATGTG  
GAATCATCGCCGAATGAGTTCAGTGTGCAAGACTGGGGATGGAGATGGACATGCTGGTCCGAGTGGGTG  
GTAAAGAGAGAAGTGAAGGAGTGGCATAAACTTCAAGGAAGCGGGTTACAGCGGGTACAAGATAAC  
ACCCATCGTTGCAATCGAATCAATTATAGAAGTGTCCCT **TGA** CATCGATAAAGCTTAATTTGTTTTCGTT  
GTGCGTGGTATTGTAATTTAGTACATTCTGGAATCTGGACTCTGGAGCATCCTTGAGATAAAGCCTGATTGTGTT  
TAAGTTTGTTTTAGACAGTAGCAAACTAATCAAATGTCTTTGCGCCATTCAAATCTTACTCGGTAAAATA  
AAAAGTTTTACTTTTAGTATTTGGACCTAA

---

NnOMT5  
(XM\_010277761)

**Table S3:** Amino acid percent-identity matrix among sacred lotus *O*-methyltransferase (OMT) candidates and functionally characterized OMTs from BIA-accumulating species. OMTs sharing more than 40% amino acid sequence identity are highlighted.

|          | NnOMT1 | NnOMT2 | NnOMT3 | NnOMT4 | NnOMT5 |
|----------|--------|--------|--------|--------|--------|
| NnOMT2   | 84     |        |        |        |        |
| NnOMT3   | 83     | 84     |        |        |        |
| NnOMT4   | 81     | 77     | 74     |        |        |
| NnOMT5   | 46     | 44     | 44     | 45     |        |
| Tf6OMT   | 69     | 64     | 62     | 62     | 46     |
| Ps6OMT   | 63     | 58     | 57     | 59     | 46     |
| Cc6OMT1  | 43     | 43     | 41     | 42     | 43     |
| Cc6OMT2  | 69     | 64     | 63     | 62     | 46     |
| Cj6OMT   | 69     | 64     | 63     | 62     | 46     |
| GfOMT2   | 69     | 64     | 63     | 63     | 47     |
| TtOMT1   | 39     | 39     | 37     | 35     | 36     |
| TtOMT2   | 38     | 38     | 36     | 34     | 36     |
| Cj4'OMT  | 54     | 51     | 52     | 50     | 45     |
| Ec4'OMT  | 52     | 50     | 51     | 50     | 43     |
| GfOMT1   | 53     | 51     | 51     | 50     | 43     |
| Ps4'OMT2 | 52     | 50     | 49     | 49     | 41     |
| PsSOMT2  | 41     | 39     | 38     | 40     | 42     |
| PsSOMT3  | 59     | 53     | 52     | 54     | 43     |
| Ct7OMT   | 44     | 43     | 42     | 39     | 38     |
| Ec7OMT   | 43     | 43     | 42     | 42     | 41     |
| Ps7OMT   | 40     | 41     | 40     | 38     | 41     |
| PsN7OMT  | 55     | 53     | 50     | 51     | 44     |
| CjCoOMT  | 42     | 40     | 39     | 40     | 45     |
| CjSOMT   | 34     | 33     | 32     | 31     | 27     |
| CtSOMT   | 34     | 34     | 33     | 31     | 27     |
| EcSOMT   | 41     | 41     | 39     | 39     | 42     |
| GfOMT6   | 35     | 35     | 34     | 32     | 27     |
| GfOMT7   | 37     | 37     | 35     | 33     | 35     |
| PsSOMT1  | 33     | 32     | 32     | 29     | 30     |

**Table S4:** Substrate range for recombinant NnOMT candidates. Substrate conversion represents the mean  $\pm$  standard deviation of three independent replicates. Structures corresponding to tested aporphine, protoberberine and morphinan substrates are shown. Nd, not detected.

| Class                | Alkaloid                                                               | Substrate conversion (nmol min <sup>-1</sup> mg <sup>-1</sup> protein) |        |        |        |                 |
|----------------------|------------------------------------------------------------------------|------------------------------------------------------------------------|--------|--------|--------|-----------------|
|                      |                                                                        | NnOMT1                                                                 | NnOMT2 | NnOMT3 | NnOMT4 | NnOMT5          |
| 1-Benzylisoquinoline | ( <i>R,S</i> )-Norcoclaurine                                           | 0.30 $\pm$ 0.02                                                        | nd     | nd     | nd     | 0.22 $\pm$ 0.03 |
|                      | ( <i>S</i> )-Norlaudanosoline                                          | 0.38 $\pm$ 0.10                                                        | nd     | nd     | nd     | 0.05 $\pm$ 0.02 |
|                      | ( <i>R</i> )-Norlaudanosoline                                          | 0.30 $\pm$ 0.08                                                        | nd     | nd     | nd     | nd              |
|                      | ( <i>S</i> )-Coclaurine                                                | nd                                                                     | nd     | nd     | nd     | 0.57 $\pm$ 0.04 |
|                      | ( <i>S</i> )- <i>N</i> -Methylcoclaurine                               | nd                                                                     | nd     | nd     | nd     | 0.68 $\pm$ 0.01 |
|                      | ( <i>S</i> )-Reticuline                                                | nd                                                                     | nd     | nd     | nd     | 0.53 $\pm$ 0.05 |
|                      | ( <i>R</i> )-Reticuline                                                | nd                                                                     | nd     | nd     | nd     | nd              |
|                      | ( <i>R</i> )-Artemepavine                                              | nd                                                                     | nd     | nd     | nd     | nd              |
| Aporphine            | Boldine                                                                | nd                                                                     | nd     | nd     | nd     | nd              |
|                      | (+)-Bulbocapnine                                                       | nd                                                                     | nd     | nd     | nd     | nd              |
|                      | (+)-Isocorydine                                                        | nd                                                                     | nd     | nd     | nd     | nd              |
| Protoberberine       | ( <i>S</i> )-Scoulerine                                                | nd                                                                     | nd     | nd     | nd     | nd              |
|                      | (13 <i>S</i> ,14 <i>R</i> )-1,13-Dihydroxy<br><i>N</i> -methylcanadine | nd                                                                     | nd     | nd     | nd     | nd              |
| Morphinan            | Codeine                                                                | nd                                                                     | nd     | nd     | nd     | nd              |
|                      | Morphine                                                               | nd                                                                     | nd     | nd     | nd     | nd              |

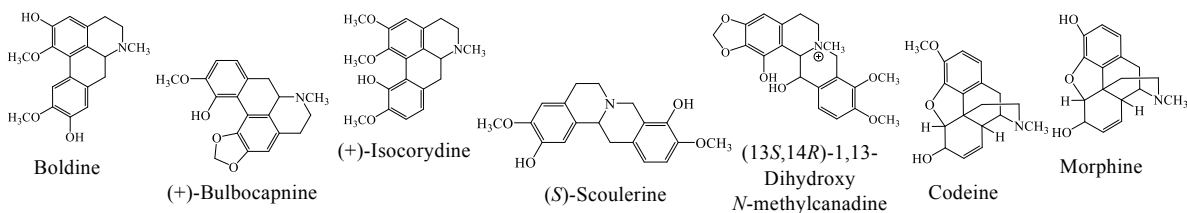

**Table S5:** Alkaloid content in different organs and tissues of two sacred lotus varieties. FL, folded leaf; UL, unfolded leaf; Rh, rhizome; Ro, roots; E, embryos; DW, dry weight.

| Lotus variety | Organ | Alkaloid content (nmol g <sup>-1</sup> DW) |               |                            |               |
|---------------|-------|--------------------------------------------|---------------|----------------------------|---------------|
|               |       | Norcochlorine                              | Cochlorine    | <i>N</i> -methylcochlorine | Artemepavine  |
| Pink          | FL    | 0.511 ± 0.011                              | 0.106 ± 0.006 | 1.696 ± 0.050              | 0.184 ± 0.000 |
|               | UL    | 0.590 ± 0.001                              | 0.152 ± 0.000 | 0.795 ± 0.018              | 0.082 ± 0.000 |
|               | Rh    | 0.067 ± 0.002                              | 0.018 ± 0.000 | 0.481 ± 0.005              | 0.030 ± 0.000 |
|               | Ro    | 0.000 ± 0.000                              | 0.004 ± 0.000 | 0.038 ± 0.001              | 0.001 ± 0.000 |
|               | E     | 0.143 ± 0.003                              | 0.093 ± 0.040 | 0.018 ± 0.003              | 0.000 ± 0.000 |
| White         | FL    | 1.396 ± 0.015                              | 0.255 ± 0.008 | 1.122 ± 0.020              | 0.155 ± 0.000 |
|               | UL    | 1.107 ± 0.058                              | 0.346 ± 0.020 | 0.460 ± 0.016              | 0.084 ± 0.000 |
|               | Rh    | 0.018 ± 0.001                              | 0.011 ± 0.000 | 0.241 ± 0.001              | 0.019 ± 0.000 |
|               | Ro    | 0.001 ± 0.000                              | 0.036 ± 0.001 | 0.017 ± 0.001              | 0.000 ± 0.000 |
|               | E     | 0.195 ± 0.009                              | 0.055 ± 0.036 | 0.184 ± 0.016              | 0.149 ± 0.001 |

**Table S6:** *O*-methyltransferase activity in different organs and tissues of two sacred lotus varieties. FL, folded leaf; UL, unfolded leaf; Rh, rhizome; Ro, roots; E, embryos.

| Lotus variety | Organ | Specific activity (nmol min <sup>-1</sup> mg <sup>-1</sup> protein) |             |             |
|---------------|-------|---------------------------------------------------------------------|-------------|-------------|
|               |       | 6OMT                                                                | 7OMT        | 4'OMT       |
| Pink          | FL    | 2.78 ± 0.44                                                         | 0.44 ± 0.04 | 0.00 ± 0.00 |
|               | UL    | 0.00 ± 0.00                                                         | 1.21 ± 0.09 | 0.00 ± 0.00 |
|               | Rh    | 0.11 ± 0.04                                                         | 0.31 ± 0.06 | 0.00 ± 0.00 |
|               | Ro    | 0.00 ± 0.00                                                         | 0.19 ± 0.04 | 0.00 ± 0.00 |
|               | E     | 1.59 ± 0.09                                                         | 0.77 ± 0.11 | 0.00 ± 0.00 |
| White         | FL    | 3.96 ± 0.85                                                         | 0.79 ± 0.13 | 0.00 ± 0.00 |
|               | UL    | 0.21 ± 0.04                                                         | 1.72 ± 0.20 | 0.00 ± 0.00 |
|               | Rh    | 0.12 ± 0.05                                                         | 0.21 ± 0.02 | 0.00 ± 0.00 |
|               | Ro    | 0.10 ± 0.01                                                         | 0.49 ± 0.02 | 0.00 ± 0.00 |
|               | E     | 3.86 ± 0.37                                                         | 0.80 ± 0.06 | 0.00 ± 0.00 |



**Table S7:** *OMT* transcript levels in different organs and tissues of two sacred lotus varieties. FL, folded leaf; UL, unfolded leaf; Rh, rhizome; Ro, roots; E, embryos.

| Lotus variety | Organ     | Mean relative transcript abundance ( $2^{-\Delta\Delta CT}$ ) |        |        |        |        |
|---------------|-----------|---------------------------------------------------------------|--------|--------|--------|--------|
|               |           | NnOMT1                                                        | NnOMT2 | NnOMT3 | NnOMT4 | NnOMT5 |
| <b>Pink</b>   | <b>FL</b> | 8804                                                          | 1153   | 2205   | 1568   | 11743  |
|               | <b>UL</b> | 1227                                                          | 85     | 222    | 359    | 11154  |
|               | <b>Rh</b> | 3792                                                          | 425    | 1295   | 721    | 7203   |
|               | <b>Ro</b> | 848                                                           | 74     | 141    | 214    | 4116   |
|               | <b>E</b>  | 1323                                                          | 957    | 1963   | 1292   | 1118   |
| <b>White</b>  | <b>FL</b> | 11752                                                         | 1378   | 662    | 3089   | 12299  |
|               | <b>UL</b> | 5579                                                          | 414    | 12     | 586    | 10747  |
|               | <b>Rh</b> | 10                                                            | 1      | 1      | 102    | 4090   |
|               | <b>Ro</b> | 1808                                                          | 173    | 152    | 406    | 3188   |
|               | <b>E</b>  | 688                                                           | 1034   | 494    | 399    | 1037   |

**Table S8:** Primers used to **(a)** amplify sacred lotus *OMT* candidate genes, **(b)** perform quantitative real-time PCR (qRT-PCR), and **(c)** linearize the pRSET-A vector. For NnOMT cDNA cloning, a 5'-3' sequence (GGT TCT CAT CAT CAT CAT CAT CAT [FW] or TCC ACC AGT CAT GCT AGC CAT ACC [RV]) was added to each OMT FW or RV primer, respectively, showed in **(a)**.

|            | Gene      | Forward primer (5'-3')             | Reverse primer (5'-3')                        |
|------------|-----------|------------------------------------|-----------------------------------------------|
| <b>(a)</b> | NnOMT1    | ATG GAA ATT CAG AAG GAA GGT CAA GC | CTA ATA AGG ATA GGC CAC AAT TAC AGA TTG AAC G |
|            | NnOMT2    | ATG GAA ATT CCG AAG                | CTA ATA AGG ATA GGC C                         |
|            | NnOMT3    | ATG GAA ATT CAG AAG GAA GTT CAA GC | CTA ATA AGG ATA GGC CTC AAT TAC AGA TTG AAC G |
|            | NnOMT4    | ATG GAA AAT CAG AAG GAA GTT CAA GC | CTA ATA AGG ATA GGC CTC AAT TAC AGA GTA CTC   |
|            | NnOMT5    | ATG GAG GAG GAC ATG AAA GC         | TCA AGG GAA CAC TTC TAT AAT TGA TTC G         |
| <b>(b)</b> | NnOMT1    | GGA CAA GAG CAT AGT GTC AAT C      | TCC ATA TGC TCC TCC CTA AC                    |
|            | NnOMT2    | GCT ATC TCC ACA CGG TAA GT         | CCT CGT CAG TGA TCG CTA ATA                   |
|            | NnOMT3    | CTG GTA CCG TCT CAA GGA TAG        | GGA TGA TCA GCC ATG CAT TC                    |
|            | NnOMT4    | GGT GTT AGG GAA GAG CAT ATC G      | CTG ATG TGA AGA GCC TGG TAT C                 |
|            | NnOMT5    | CAG TGG GTG GTA AAG AGA GAA G      | AGA TAA CAC CCA TCG TTG CA                    |
|            | NnB-Actin | AGG GAG AAG ATG ACC CAG ATT A      | GTT GTT CTA CCA CTG GCG TAT AG                |
| <b>(c)</b> | Vector    | GGT ATG GCT AGC ATG ACT            | ATG ATG ATG ATG ATG ATG AGA                   |

**Table S9:** Amino acid sequence of functionally characterized OMTs involved in BIA biosynthesis in the Ranunculales. Enzymes are represented according to their primary reported regiospecificity.

| Specie                          | GenBank ID (abbreviation) | Amino acid sequence                                                                                                                                                                                                                                                                                                                                                                     | Ref. |
|---------------------------------|---------------------------|-----------------------------------------------------------------------------------------------------------------------------------------------------------------------------------------------------------------------------------------------------------------------------------------------------------------------------------------------------------------------------------------|------|
| <b>4'OMT</b>                    |                           |                                                                                                                                                                                                                                                                                                                                                                                         |      |
| <i>Coptis japonica</i>          | D29812 (Cj4'OMT)          | MAFHGKDDVLDIKAQAHVWVKIYGFADSLVLRCAVELGIVDIIDNNNQPMALADLASKLPVSDVN<br>CDNLYRILRYLVKMEILRVEKSDDGQKYLEPIATLLSRNAKRSMVPMILGMTQKDFMTPWHS<br>MKDGLSDNGTAFEKAMGMTIWEYLEGHPDQSQLFNEGMAGETRLLTSSLISGSRDMFQGDLSVD<br>VGGNGTTVKAISDAFPHIKCTVFDLPHVIANSYDLPNIERIGGDMFKSVPSAQAILKLILHDWND<br>EDSIKILKQCRNAVPKDGGKVIIVDVALDEESDHELSSSTRLLDIDMLVNTGGKERTKEVWEKIVKS<br>AGFSGCKIRHIAAIQSVIEVFP           | (6)  |
| <i>Eschscholzia californica</i> | AB745041 (Ec4'OMT)        | MGLEFNEEVDIKAQAHLWNIYGFADSLVLRSAVELGIADIKNNGSITVSELASKLPISNVNSDNL<br>YRVLRYLVHMGILKETKSTINGGEIKKLYLEPVGSLLVKDAERNMVPVILGMTQQDFMIPWHYI<br>KEGLGEGSTAFEKGMGMTLWEYLEGHPEQGHFNVGMEGETRLLTKTLIESCKDTFEGLSLVDV<br>GGNGTITKAISEAFPHIKCSLYDLPHVVADSHDLPNIEKIPGDIFKIPNAQAILKLILHDWDEDS<br>VKILKKCREAVPQDTGRVIIVDVALEEESEHPLTKTRLVLDVDMVNTGGRRSEDDWAKLLKLA<br>GFRTHKIRHIAAVQSVIEAFP               | (7)  |
| <i>Glaucium flavum</i>          | KP176693 (GfOMT1)         | MGVSDNKPESQEVDIKAQAHLWNIYGFADSLVLRCAVEIGIADIKNNGSISVTELASKLPIITNVN<br>SDNLYRVLRYLVHMGILKEVSDSNEVKLYSLQPVATLLLRDAERSMVPILGMTQKDFMIPWHFM<br>KEGLGNDTTAFEKGMGMTIWQYLEGHPEQSNLFNEGMAGETRLLTKSLIDGCRDTFEGTSLCDV<br>GGNGTITKGIYDAFPQIKCSYDLPVVIASSPEHPNIERIPGDMFKSVPSAQAILKLILHDWTDEE<br>CVNILIKCREAVPKDTGKVIIVDVALEEESEHPLTKTRLVLDVDMVNTGGRRSEDDWEKLLKRA<br>GFRGHKIRHIAAIQSVIEAFP            | (8)  |
|                                 | AY217334 (Ps4'OMT2)       | MGSLDAKPAATQEVSIKDAQLWNIYGFADSLVLRCAVEIGIADIKNNDGAIITLAQLAALKPIT<br>NVSSDYLRYRMVRYLVHLNIEQETCNGGVEKVVYSLKPVGTLLLRDAERSMVPILGMTQKDFMV<br>SWHFMKEGLGNGSTTAFEKGMGMIDIWKYLEGNPDQSQLFNEGMAGETRLLTKTLIEDCRDTFQ<br>LDSLVDIGGGNGTTIKAIYEAFFPHIKCTVFDLPHVVANSHDLPNIEKVPGDMFKSVPSAQAILKLIL<br>HDWTDEECVNILKKCKEAIKPKETGKVIIVDVALEEESEHPLTKTRLVLDVDMVNTGGRRERTADDW<br>ENLLKRAFGRSHKIRPIRAIQSVIEAFP | (9)  |
| <i>Papaver somniferum</i>       | Ps4'AOMT                  | MEIHLESQEQEMKYQSQIWNQICGTVDTSVLRCAIQLGIFDAIHNSGKPMITLTELSSIVSSPSSSIE<br>PCNLYRLVRYLSQMDLISIGECLNEATVSLTGTSKLLLRNQEKSLIDVWLAIXCEMMVVVWHEL<br>SSVSTPADEPPIFQKVHGNNALELAGEFPEWNDLINNAMTSDTSTVKPALIQGCGKILNGVTSIDV<br>GGHGATMAYIVEAFPHIKGAVIDLPHVVEAAPERPGVEFISGDIFKSISNADAVLLKYVLHNWED<br>TECVNLLKRCKEAVPADKGVIIIMDLVIDDDNSILTQAKLSLDLTMNHGGGRERTKEDWRNLI<br>EMSGFSRHEIIPISAMPPIIYAYP      | (10) |
|                                 | MH029292 (PsSOMT2)        | MEVSKIDQENQAKIWKQIFGFAESLVLKCAVQLEIAETLHNNVKPMSLSELASKLPAQPVNEDRL<br>YRILHFLVHMKLFNKDATTQKYSLAPPAKYLLKGWEKSMVPSILSVTDKDFAPWNHLDGDLTG<br>NNAFEKALGKIRVYMRNPEKQDLFNEGMACDTRLFASALVNECKSIFSDGINTLAGVGRGTG<br>TAVKAIKAFPDIKCTIHDLPVTSKNSKIPRDVFKSVPSADAFMKSLHEWNEECIQILKRCKEAI<br>PKGGKVIADVVIMDSTHPYKSRSLAMDMLAMMLHTGGKERTEDWKKLIDAAAGFASCKITKLSA<br>LQSVIEAYPH                            | (10) |
|                                 | MH029294 (PsSOMT3)        | MEVSKIDQENQAKIWKQIFGFAESLVLKCAVQLEIAETLHNNVKPMSLSELASKLPAQPVNEDRL<br>YRILHFLVHMKLFNKDATTQKYSLAPPAKYLLKGWEKSMVPSILSVTDKDFAPWNHLDGDLTG<br>NNAFEKALGKIRVYMRNPEKQDLFNEGMACDTRLFASALVNECKSIFSDGINTLAGVGRGTG<br>TAVKAIKAFPDIKCTIHDLPVTSKNSKIPRDVFKSVPSADAFMKSLHEWNEECIQILKRCKEAI<br>PKGGKVIADVVIMDSTHPYKSRSLAMDMLAMMLHTGGKERTEDWKKLIDAAAGFASCKITKLSA<br>LQSVIEAYPH                            | (10) |
| <b>6OMT</b>                     |                           |                                                                                                                                                                                                                                                                                                                                                                                         |      |
| <i>Coptis chinensis</i>         | MH165875 (Cc6OMT1)        | MQIQNEEQEQDMKSHAQILNHMCGIVDSVVLKCAVELNLFDFVISNNKDSKPIALSSLATSPTLVSI<br>KPNNLYRLLRYLVHMNLLTIHVEGNDETFSLELSKLLLRDQNRSLVDWALAIIDETVIDGWHEELS<br>GCCTSPTGPTPFERVHGKSVWELAGENAGMNQVINDAMVSDTILVMPVVFQCCDKLLNGITSMV<br>DIGGGVGMTMSYIVKAFPHIKCTVFDLPHVIASSAQLPGVEMVGGDMFKFIPADAFILKFMHLN<br>WHDKECITILKKCKEVIPQDKGKVIIVDQNEQDDDLTRAKMNLIDMMVTSGGRETTENEW<br>EVLLKLAGFSRHEIIPIMAVQSVIYAYP       | (11) |
|                                 | MH165876 (Cc6OMT2)        | MVKKDNLSSQAKLWNFIYGAESLVLKCAVQLDLANIIHNSGTSMTSELSSRLPSQPVNEDALY<br>RVMRYLVHMKLFKASIDGELRYGLAPPAKYLVKGVWDCMVGSIILAITDKDFMAPWHYKLDGL<br>AGESGTAFEKALGMNIWGYMAEHPEKNQLFNEAMANDSRLIMSALVKECGNIFNGITLVDVGG<br>GTGTAVRNIANAFPHIKCTVYDLPHVIADSPGYSEVHCVAGDMFKFIPKADAIMMKCILHDWDDK<br>ECIEILKRCKEAVPIEGGKVIIVDVLNVQSEHPYTKMRLTLDLDMMLNTGGKERTEEEWKNLIHD<br>AGYKGHKITQITAVQSVIYAYP               | (11) |
| <i>Coptis japonica</i>          | D29811 (Cj6OMT)           | MEVKKDNLSSQAKLWNFIYGAESLVLKCAVQLDLANIIHNSGTSMTSELSSRLPSQPVNEDALY<br>RVMRYLVHMKLFKASIDGELRYGLAPPAKYLVKGVWDCMVGSIILAITDKDFMAPWHYKLDGL<br>SGESGTAFEKALGTNIWGYMAEHPEKNQLFNEAMANDSRLIMSALVKECGNIFNGITLVDVGGG<br>TGTAVRNIANAFPHIKCTVYDLPHVIADSPGYSEVHCVAGDMFKFIPKADAIMMKCILHDWDDKE<br>CIEILKRCKEAVPVKGGKVIIVDVLNVQSEHPYTKMRLTLDLDMMLNTGGKERTEEEWKNLIHD<br>AGYKGHKITQITAVQSVIYAYP              | (6)  |

|                                 |                    |                                                                                                                                                                                                                                                                                                                                                                                              |
|---------------------------------|--------------------|----------------------------------------------------------------------------------------------------------------------------------------------------------------------------------------------------------------------------------------------------------------------------------------------------------------------------------------------------------------------------------------------|
| <i>Glaucium flavum</i>          | KP176694 (GfOMT2)  | MEATKSDQANQANIWKLIYGF AESLVLKCAIQLEIADTIHNGEPMSLSELASKLPVQPVNSDRLY RVMRYLVHMKLFNKEKTSINGEFKYSLAPPAKFLIKGW EKSMVASILAINDKDFLAPWHHLKDGL SGDCDAFEKALGKSIWVYMS ENPEKNQLFNEAMACDTRLVTSALVND CQSVFKGINTLV DVGGG (8) TGTAVKAISKAFPHIKCSIYDLPHVIADSP EIPNVVKIEGDMFKAIP SADA ILMKCILHDWNDDECIQ ILKKCKEAVPQEGGKVIIVDVV LNM DLTHPYSKIRL TLDLDMMLNTGGKERTVEEWKKLIDAAGF ASFKITEISAVQSVIEAFPY              |
| <i>Papaver somniferum</i>       | AY217335 (Ps6OMT)  | METVSKIDQQNQA KIWKQIYGF AESLVLKCAVQLEIAETLHNNVKPMSLSELASKLPVAQP VNE D RLF RIMRYLVHME LFKIDATTQKYSLAPPAKYLLRGW EKSMVDSILCINDKDFLAPWHHLGDGLT GNCDAFEKALGKSIWVYMSV NPEKNQLFNAAMACDTRLVTSALANECKSIFSDGISTLV DVGGGT (9) GTAVKAISKAFPD IKTCTIYDLPHVIAD SXEIPNITKISGDMFKSIP SADAIFMFKCILHDWNDDECIQIL KRCKEALPKGGKVIIVDVVIDMDSTHPYAKIRL TLDLDMMLNTGGKERTKEEWKTLFDAAGFAS HKVTQISAVQSVIEAOPY           |
| <i>Thalictrum flavum</i>        | AY610507 (Tf6OMT)  | MEMINKENLSSQAKLWNFIYGFADSLV LKSAVQLDLANIHNHGSPMTLSELHLPSQPVNQDAL YRVLRYLVHMKLFTKSSIDGELRYGLAPPAKFLVKGW DCM LGAILTITDKDFMAPWHYLKEGIL NDGSTSTAFEKALGTNIWDYMAEHPEKNQLFNEGMANDRLIMSALVKEC SSMFDGITTIVDVGG (12) GTGTAVRNIKA FPHIKCTVYDLPHVIADSPGYTEINSIQGDMFKYIPNADAIMMKCILHDWDDKE CIEILKRCKDAVPRDGGKVIIVDVKSEHPYTKMRL TLDLDMMLNTGGKERTEEEWKLIHDA GYKGYKITHISAVQSVIEAOPY                          |
| <i>Thalictrum tuberosum</i>     | AF064693 (TiOMT1)  | MGSTENNHNLTPEEEEEAYLHAMQLASASV LPMVLKAAIELDVLEIIAKAGKGAYVAPSEIAS QLSTSNQAPT VLD RMLRLLASYKVLTCNLRNLEDGGVERLYGLAPVCKFLVKNE DGVSMAPLV LMNQDKVLMESWYHLKDAVLDGGIPFNKAYGMTAF EYHGTDRFNKVFNRGMADHSTITMKKL (13) LELYKGF EGLKSVVDVGGGTGATVNMI VTKHPTIKGINFDLPHVIDDAPAYPGVEHIGGDMFVSV PKGDAIFMKWILHDWSDEHSVKFLKNCYESIPADGKVIIVESVLPVFPETNLA AHTCFQLDNIMLA HNPGGKERTEKDFKALSAGFTGFKVCGAFGSWVMEFCK      |
| <i>Thalictrum tuberosum</i>     | AF064694 (TiOMT2)  | MGSTQKNHNLTPEEEEEACLHAMQLASASV LPMVLKAAIELSVLEIIAKAGQGAYVAPTEIASQLS TSNSQAPIILDRI LRLLASYKVLTCNLRTLEDGGVERLYGLAPVCKFLVKNE DGVSIAPLVLMNQD (13) KVLME SWYHLKDAVLDGGIPFNKAYGMTAF EYHGTDRFNKVFNRGMADHSTITMKKLELYK GF EGLKSVVDVGGGTGATINMI VTKHPTIKGINFDLPHVIDDAPAYPGVEHIGGDMFVSVPKGDAI FMKWILHDWSDEHSVKFLKNCYESIPADGKVIIVESILPVYPETNLA SNA CFQLDNIMLAHNPGGK ERTEKDFEALS AKAGFTGFKIVCGAFGSWVMEFCK |
| <b>7OMT</b>                     |                    |                                                                                                                                                                                                                                                                                                                                                                                              |
| <i>Coptis teeta</i>             | MH165877 (Ct7OMT)  | METILQGGQNITKLLFAFADTMALKCVVELRIADIINSHGLPISLSEIAAGIQSTSSSSSPNINYLFR I MRLLVVRKGVFSSHAPNQNEETLYGLTNS SKWLLRDANFSMTPHIAL THHCSMDSFHKL NKCVEE (11) GGYAF AKANGCEIWEFASMNPEFNRLFN SAMASTSKIAVDAILSGYKNGFDGLRSLVDVGGGTGT LIGEIVKAYPHL TGTNFDLPHVVA TAPEHTGVVHVGGDMFVEIPHADAILK WILHDWNEDECVKI LKNCHKAIANRGVKVIIVEIVLQPDGVAPLDETR LIFDLSMIAHSSGGKERTETEWEKLLRDGGFSR HRIIQIPDVTSIIEAOPY            |
| <i>Eschscholzia californica</i> | AB232153 (Ec7OMT)  | MDEEILGQADICKYMYGFVDSMTLR CVV ELGIPDIHSHGRPITL TEILNGIPNLSSSFDINYLQGIM TILVRRRVFAVHKFDPKDG TNLTEIRYGLTPSSKCLLKDSKFN LAPVLETHPWITDPWNYL GKC (14) VQEGGSGFVKAHGSDFVFKFGSDHPEFFKLFYDGM ECSTKVLVQVVL D KYQVFKDVKSIVDVGG GTGMMISEIVKNHPHIKGINFDLPHVVAEAPDY PGVEHVGGDMFVEIPQADAITMKGILHDWND D ACVKILENCKKAIPKNGKVIIVDCV LNPDGDDLFD DIKVVSDLGMRVHCS D GKERTEA EWKLLK KGGFPRYKITHVVTVQSMIEAOPY       |
| <i>Papaver somniferum</i>       | AY268893 (Ps7OMT)  | MDTAEERLKGQAEIWEHMF AFVDSMALKCAVELGIPDIHSHGRPVTISEIVDSLKTNT P SSSPNID YLTRIMRLLVHKRLFTSELHQESNQLLYNL TRSSK WLLKDSKFNLSPLVLWETNPILLKPWQYLGK CAQEKSSPFERAHGCEIWDLALADPKFNFLNGAMQCSTTTIINEMLLEYKDGFSGIAGSLVDVGG (15) GTGSIIAEIVKAHPHIQGINFDLPHVVA TAAEFPGVKHVGGDMFVDIPEADAVIMKWILHDWSD E D CTHLKNCYRAIRKKKNGKVIIVDCVLRPDGNDLFDKMGLIFDVLMMAH TTAGKERTEA EWKILL NNAGFPRYNVIRTPAFPCIEAFPE          |
| <i>Papaver somniferum</i>       | FJ156103 (PsN7OMT) | MEVVSQIDQENQAIIWKQIYGFSESL LKCAVQCEIAETIHNHGTPMSILELA AKLPIDQPVNIDRLY RVMRYLVHQKLFNKEVISTLNGGTVQVTEKYWLAPPAKYLRGSSQSMVPSVLGIIED E MFAPW (16) HILKDSL TGE CNIFETALGKSISVYMS ENPEMNQISNGAMAFDSGLV TSHLVNECKSVFGDEIKTLV DVGGGTGTALRAISKAFPNIKCTFDLPHVIADSP EIPTITKVS GDMFKSIP SADAIFMKNILHDWND DECIQILKRCKDVVSAGGKLIMVEMVLD EDSFHPYSKLR L TSDIDMMVNNGGKERTEK EWKLF DAAGFASCKFTQMSVGF AAQSIIEVY  |
| <b>CoOMT</b>                    |                    |                                                                                                                                                                                                                                                                                                                                                                                              |
| <i>Coptis japonica</i>          | AB073908 (CjCoOMT) | MDTPNTFQNDDEIKAQAQVVKHMF GFAETIMLRSTVSLGIPDIHNGPVTLSQLVTHLPLKSTSID RFHHFMRYLVHMQFLTISTDQITKEDKYELTPASKLLVHGHQKSLAPYVMLQTHPEEFSVW SHVI (17) NVLDGKKPYWESNDTSMYEKTEGDEPEINELNDAMTSHSTFMLPALVSGLMKENVLDGVASIVD VGGNSGVVAKGIVDAFPHVKSVMDLNHVI ERVIKPNKLDYVAGDMFTSIPNADAILKSTLHNY EDDDCIKILNIAKEALPSTGGKVLVEIVVDTENLPLFTSARLSMGMDMLMSGKERTKKEWEDL LRKANFTSHQVIPIMAIESIIVAYS                       |

SOMT

|                                 |                      |                                                                                                                                                                                                                                                                                                                                                                                                                      |      |
|---------------------------------|----------------------|----------------------------------------------------------------------------------------------------------------------------------------------------------------------------------------------------------------------------------------------------------------------------------------------------------------------------------------------------------------------------------------------------------------------|------|
| <i>Coptis japonica</i>          | D29809<br>(CjSOMT)   | MCTSLSELKCPVFSTRKRLLEFALRTSVDMAAQEGVNYLSGLGLSRLICLPMALRAAIELNVFEII<br>SQAGPDAQLSPSDIVAKIPTKNPSAAISLDRILRMLGASSILSVSTTKSGRVYGLNEESRCLVASEDK<br>VSVVPMMLFTSDKAVVESFYNIKDVVLEEGVIPFDRTHGMDFFQYAGKEERVNKSFNQAMGAGS<br>TIAFDEVFKVYKGFNDLKVLDVGGGIGTSLSNIVAKHPHIRGINFELPHVIGDAPDYPGVEHVPGD<br>MFEQVNPNAQNILLKWLHDWDDDRSIKILKNCWKALPENGTVIVIEFVLPQVLGNNAESFNALTP<br>DLLMMALNPGGKERTTIEFDGLAKAAGFAETKFFPISQGLHVMEFHKINC      | (18) |
| <i>Coptis teeta</i>             | MH165874<br>(CtSOMT) | MAAQEGVNYLSGLGLSRLICLPMALRAAIELNVFEIISKAGPDAQLSPSDIVAKIATKNPSAAISLDR<br>ILRMLGASSILSVSTTKSGRVYGLNEESRCLVASEDKVSVVPMMLFTSDKAVVESFYNIKDVVLEE<br>GVIPFDRTHGMDFFQYAGKEQVRNKSFNQAMGAGSTIAFDEVFEVYKGFNNLKVLDVGGGIGT<br>SLSNIVAKYPHIRGINFELPHVIGDAPDYPGVEHVPGDMFEGVNPNAQNILLKWLHDWDDDRSIKI<br>LKNCWKALPENGTVIVIEFVLPQVLGNNAESFNALTPDLLMMALNPGGKERTTIEFDGLAKAAGF<br>AETKFFPISQGLHVMEFHKINC                                   | (11) |
| <i>Eschscholzia californica</i> | LC171865<br>(EcSOMT) | MEKGKLEVEEEMELQQAADICKLMLAFIDSMALKCAVELGIPDIIHSQGPITLSEIINGIPNLSPSF<br>DINYLFRIMRLLVRNRVFSAYEPDLKDGSSGKTLYGLTPSSKWLKDKSKISLAPLVAENHPWLL<br>DPWHYLKGCVQEGGFACAKAHGSEIWKFGSENPEFNKLFVSGMACSSTLVVDAILDDYHEGFGD<br>LESIVDVGGAIGTLINEIVKYPHIRGTNFDLPHVVAEALENPGVAHVGGDMFVEIPSADAVILKW<br>VLHDWNEDECVKILKNCNKAINKGLIIECVLKPDPGEGLFDGLGLAFDMLIAHSSGGRERTEA<br>EWWKLLKAGGFSRYKITPIKGPSIIIEAYPDI                              | (19) |
| <i>Glaucium flavum</i>          | KP176698<br>(GfOMT6) | METKGEARMNSCYISEAGHLGRLICLPMALRAAVELNVFNISEFGPGAQLSSRDVAKIPTTNPNA<br>HVYLERILRLLAASSFLSVSTRTSSSPESITNTNGHHNGDTNGVVNHDNEKVTERVYGLTKESHCL<br>VPRKDDGVSLVPMLMFVADKIVVESFYNLKEVVLQEGRPFDMTGASIFEYAGKDPRMNKVFN<br>EAMGDFS VIAFDEVLVK VYNGFLDMKELVDVGGGIGTSLSNIVTKYPFIRGINFDLSHVISSAPNYTG<br>VEHVAGDMFEELPKAQNILLKWLHDWDDKQCLKLLKTCWNSLPAEAGGKVVIVIEFVVPSKIADN<br>PESYNALTPDLLMMALNPGGKERTLLEFYDLANAAGFAKAKPFPISQGLHVIEFHK | (8)  |
|                                 | KP176699<br>(GfOMT7) | MGSTQDQFKPTPIEEEEACMYAMQLASASVPVMVLKAAVELNVLEIIAKHGPQAQISASIAAAHI<br>PNIKNPNAVMLDRMLRLLASYKILTCTVKDLDDQGLVQQRLYGLALVCKFLVKNEGDGCSMAPL<br>LLMNQDKVFLESWYHLKDAVLDGGIPFNKAYGMNAFEYQGADPRFNKIFNRGMSDHTTITMKKI<br>LETYKGFEGTLTSLVDVGGGIGVTVDMIVSKYPSIKGINFDLPHVIKDAPSYPGVEHVGGDMFASIPK<br>GDAIFMKWILHDWSDEHGKILKNCYEALPDHGKVLVECIIPPYPETSLAGLVFHDNIMLAHNP<br>GGKERTKEFEALAKGTGFAGFRVICSAFNTWIMEFSKN                       | (8)  |
| <i>Papaver somniferum</i>       | JN185323<br>(SOMT1)  | MATNGEIFNTYGHNRQTATVTKITASNESSNGVCYLSETANLGLKICIPMALRAAMELNVFQLISK<br>FGTDAKVSAEIASKMPNANKNPEAAAMYLDRLRLLGASSILSVSTTKKINRGDDVVVHEKLYG<br>LTNSSCCLVPRQEDGVSLVEELLFTSDKVVVDSFFKLCVVEEKDSVPFEVAHGAKIFEYAATEPR<br>MNQVFNDGMAVFSIVVFEAVRFYDGLDMKELLDVGGGIGTSVSKIVAKYPLIRGVNFDLPHVIS<br>VAPQYPGVEHVAGDMFEEVPGQNMLLKWVLHDWGDERCVKLLKNCWNSLPVGGKVLIEFVFL<br>PNELGNNAESFNALIPDLLMALNPGGKERTISEYDDLGAAGFIKTIPISNGLHVIEFHK      | (20) |

## References

1. Robin, A. Y., Giustini, C., Graindorge, M., Matringe, M., and Dumas, R. (2016) Crystal structure of norcoclaurine-6-O-methyltransferase, a key rate-limiting step in the synthesis of benzyloisoquinoline alkaloids. *Plant J.* 87, 641-653
2. Zhang, L., Shi, J., Tang, J., Cheng, Z., Lu, X., Kong, Y., and Wu, T. (2017) Direct coupling of thin-layer chromatography-bioautography with electrostatic field induced spray ionization-mass spectrometry for separation and identification of lipase inhibitors in lotus leaves. *Anal Chim Acta.* 967, 52-58
3. Lin, Z., Yang, R., Guan, Z., Chen, A., and Li, W. (2014) Ultra-performance LC separation and quadrupole time-of-flight MS identification of major alkaloids in *Plumula Nelumbinis*. *Phytochem Anal.* 25, 485-494
4. Deng, X., Zhu, L., Fang, T., Vimolmangkang, S., Yang, D., Ogotu, C., Liu, Y., and Han, Y. (2016) Analysis of Isoquinoline Alkaloid Composition and Wound-Induced Variation in *Nelumbo* Using HPLC-MS/MS. *J Agric Food Chem.* 64, 1130-1136
5. Luo, X., Chen, B., Liu, J., and Yao, S. (2005) Simultaneous analysis of *N*-nornuciferine, *O*-nornuciferine, nuciferine, and roemerine in leaves of *Nelumbo nucifera* Gaertn by high-performance liquid chromatography–photodiode array detection–electrospray mass spectrometry. *Analytica Chimica Acta.* 538, 129-133
6. Morishige, T., Tsujita, T., Yamada, Y., and Sato, F. (2000) Molecular characterization of the S-adenosyl-L-methionine:3'-hydroxy-N-methylcoclaurine 4'-O-methyltransferase involved in isoquinoline alkaloid biosynthesis in *Coptis japonica*. *J Biol Chem.* 275, 23398-23405
7. Inui, T., Tamura, K., Fujii, N., Morishige, T., and Sato, F. (2007) Overexpression of *Coptis japonica* norcoclaurine 6-O-methyltransferase overcomes the rate-limiting step in Benzyloisoquinoline alkaloid biosynthesis in cultured *Eschscholzia californica*. *Plant Cell Physiol.* 48, 252-262
8. Chang, L., Hagel, J. M., and Facchini, P. J. (2015) Isolation and Characterization of O-methyltransferases Involved in the Biosynthesis of Glaucine in *Glaucium flavum*. *Plant Physiol.* 169, 1127-1140
9. Facchini, P. J., and Park, S. U. (2003) Developmental and inducible accumulation of gene transcripts involved in alkaloid biosynthesis in opium poppy. *Phytochemistry.* 64, 177-186
10. Park, M. R., Chen, X., Lang, D. E., Ng, K. K. S., and Facchini, P. J. (2018) Heterodimeric O-methyltransferases involved in the biosynthesis of noscapine in opium poppy. *Plant J.* 95, 252-267
11. He, S. M., Liang, Y. L., Cong, K., Chen, G., Zhao, X., Zhao, Q. M., Zhang, J. J., Wang, X., Dong, Y., Yang, J. L., Zhang, G. H., Qian, Z. L., Fan, W., and Yang, S. C. (2018) Identification and Characterization of Genes Involved in Benzyloisoquinoline Alkaloid Biosynthesis in *Coptis* Species. *Front Plant Sci.* 9, 731
12. Samanani, N., Park, S. U., and Facchini, P. J. (2005) Cell type-specific localization of transcripts encoding nine consecutive enzymes involved in protoberberine alkaloid biosynthesis. *Plant Cell.* 17, 915-926
13. Frick, S., and Kutchan, T. M. (1999) Molecular cloning and functional expression of O-methyltransferases common to isoquinoline alkaloid and phenylpropanoid biosynthesis. *Plant J.* 17, 329-339
14. Fujii, N., Inui, T., Iwasa, K., Morishige, T., and Sato, F. (2007) Knockdown of berberine bridge enzyme by RNAi accumulates (S)-reticuline and activates a silent pathway in cultured California poppy cells. *Transgenic Res.* 16, 363-375
15. Ounaroon, A., Decker, G., Schmidt, J., Lottspeich, F., and Kutchan, T. M. (2003) (R,S)-Reticuline 7-O-methyltransferase and (R,S)-norcoclaurine 6-O-methyltransferase of *Papaver somniferum* - cDNA cloning and characterization of methyl transfer enzymes of alkaloid biosynthesis in opium poppy. *Plant J.* 36, 808-819
16. Pienkny, S., Brandt, W., Schmidt, J., Kramell, R., and Ziegler, J. (2009) Functional characterization of a novel benzyloisoquinoline O-methyltransferase suggests its involvement in papaverine biosynthesis in opium poppy (*Papaver somniferum* L). *Plant J.* 60, 56-67
17. Morishige, T., Dubouzet, E., Choi, K. B., Yazaki, K., and Sato, F. (2002) Molecular cloning of columbamine O-methyltransferase from cultured *Coptis japonica* cells. *Eur J Biochem.* 269, 5659-5667
18. Takeshita, N., Fujiwara, H., Mimura, H., Fitch, J. H., Yamada, Y., and Sato, F. (1995) Molecular cloning and characterization of S-adenosyl-L-methionine:scoulerine-9-O-methyltransferase from cultured cells of *Coptis japonica*. *Plant Cell Physiol.* 36, 29-36
19. Purwanto, R., Hori, K., Yamada, Y., and Sato, F. (2017) Unraveling Additional O-Methylation Steps in Benzyloisoquinoline Alkaloid Biosynthesis in California Poppy (*Eschscholzia californica*). *Plant Cell Physiol.* 58, 1528-1540
20. Desgagne-Penix, I., and Facchini, P. J. (2012) Systematic silencing of benzyloisoquinoline alkaloid biosynthetic genes reveals the major route to papaverine in opium poppy. *Plant J.* 72, 331-344
